# Supplementary material for: A mitochondrion-targeted BODIPY-Ir(iii) conjugate as a photoinduced ROS generator for the oxidative destruction of triple-negative breast cancer cells
Source: Royal Society of Chemistry journal article supplement (doi:10.1039/d1dt01460a), 2021-01-01
Supplement: d1dt01460a1.pdf [file d1dt01460a1.pdf]

## Supporting Information

# **A mitochondria-targeted BODIPY-Ir(III) conjugate as a photoinduced ROS generator for the oxidative destruction of triple-negative breast cancer cells**

Liping Qiao,<sup>a</sup> Jiangping Liu,<sup>\*a</sup> Shi Kuang,<sup>a</sup> Xinxing Liao,<sup>a</sup> Junfeng Kou,<sup>c</sup>

Liangnian Ji,<sup>a</sup> and Hui Chao<sup>\*a,b</sup>

<sup>a</sup> MOE Key Laboratory of Bioinorganic and Synthetic Chemistry, School of Chemistry, Sun Yat-Sen University, Guangzhou 510275, P. R. China.

<sup>b</sup> MOE Key Laboratory of Theoretical Organic Chemistry and Functional Molecule, School of Chemistry and Chemical Engineering, Hunan University of Science and Technology, Xiangtan, 400201, P. R. China.

<sup>c</sup> College of Chemistry and Chemical Engineering, Yunan Normal University, Kunming, 650500, P. R. China

Email: ceschh@mail.sysu.edu.cn; cesliujiangping@foxmail.com

# Table of Contents

|                                            |          |
|--------------------------------------------|----------|
| <b>Synthesis .....</b>                     | <b>1</b> |
| Scheme S1 .....                            | 1        |
| <b>Supporting Figures and Tables .....</b> | <b>1</b> |
| Fig. S1 .....                              | 2        |
| Fig. S2 .....                              | 3        |
| Fig. S3 .....                              | 4        |
| Fig. S4 .....                              | 4        |
| Fig. S5 .....                              | 4        |
| Fig. S6 .....                              | 5        |
| Fig. S7 .....                              | 5        |
| Fig. S8 .....                              | 6        |
| Fig. S9 .....                              | 6        |
| Table. S1 .....                            | 7        |
| Table. S2 .....                            | 8        |
| Table S3 .....                             | 9        |
| References .....                           | 9        |

## Synthesis

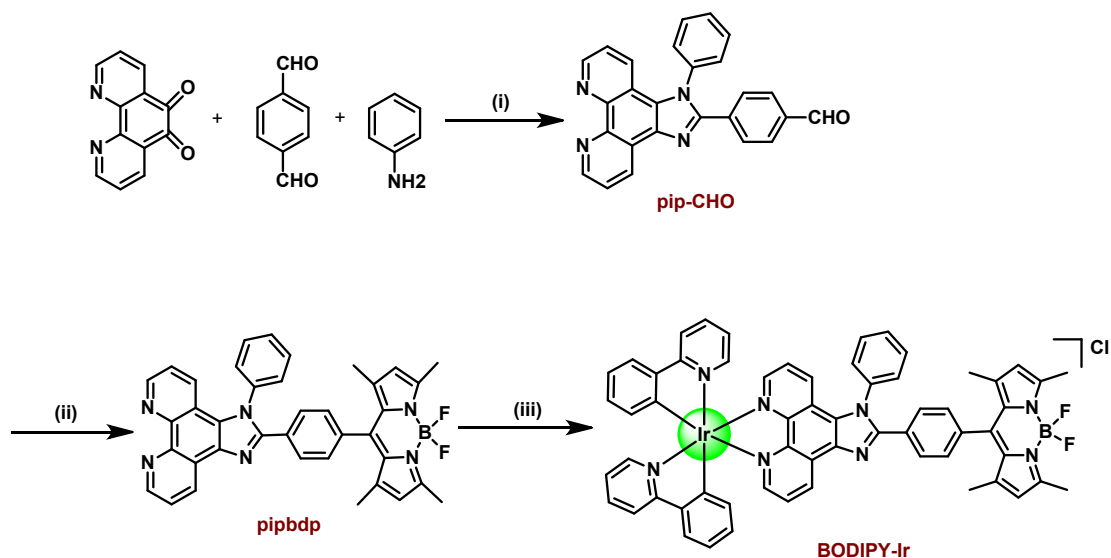

**Scheme S1.** Synthetic routes for **BODIPY-Ir**. (i) AcOH, reflux overnight. (ii) DCM, 2,4-dimethylpyrrole, TFA, DDQ, TEA, BF<sub>3</sub>·Et<sub>2</sub>O, RT. (iii) [Ir(ppy)<sub>2</sub>Cl]<sub>2</sub>, DCM/MeOH, reflux, 12h

## Supporting Figures and Tables

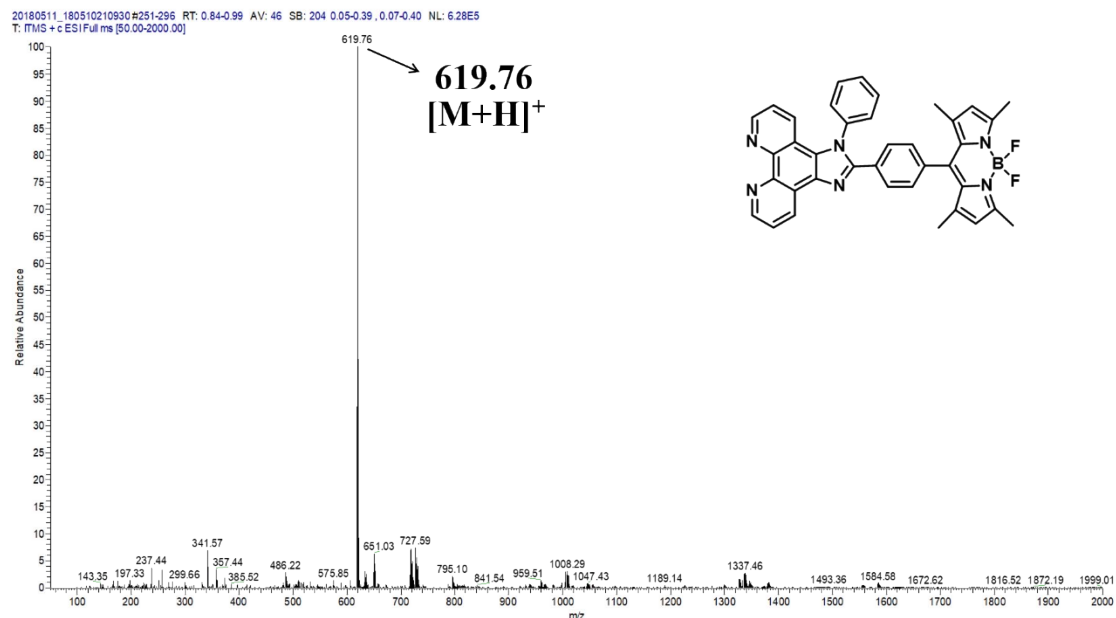

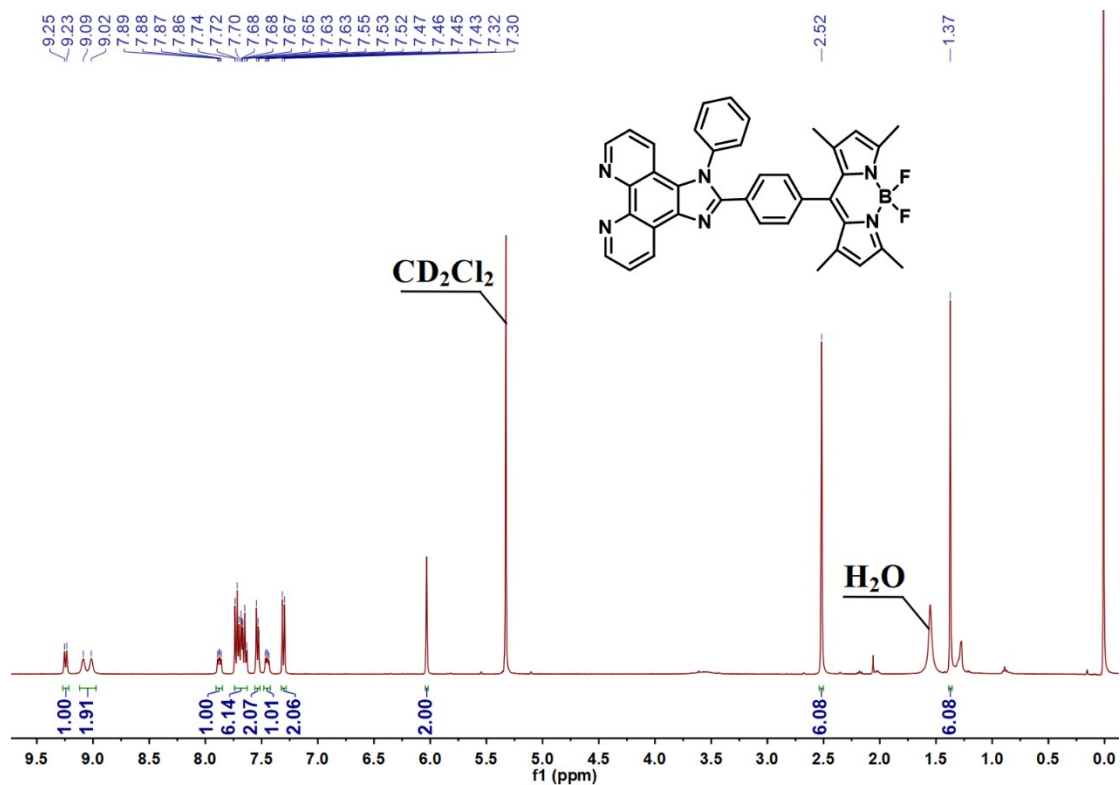

**Fig. S1** ESI-MS spectrum, <sup>1</sup>H NMR spectrum of **pipbdp**

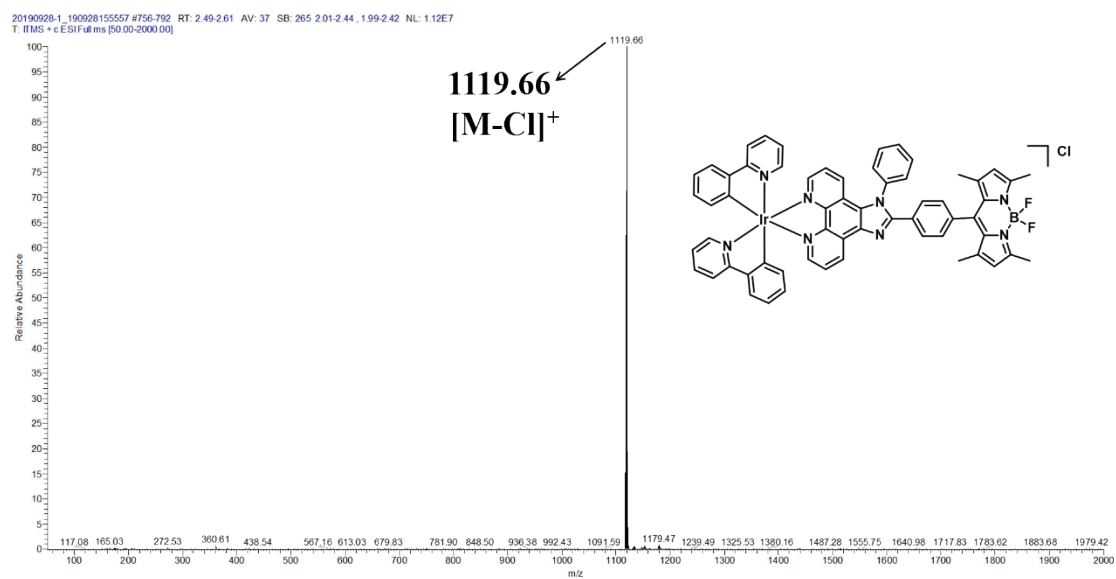



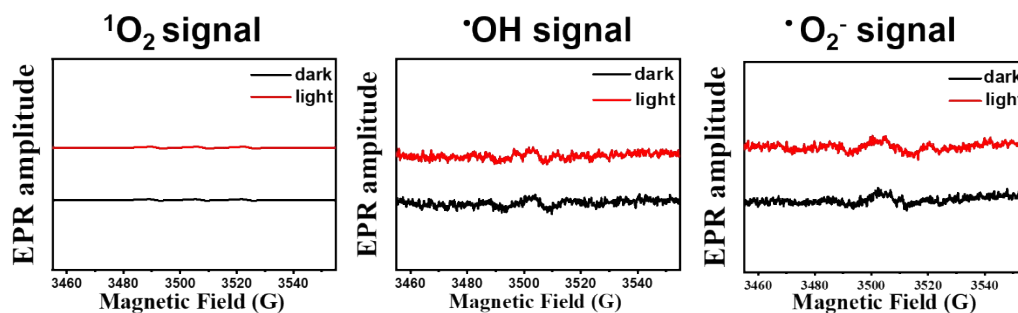

**Fig. S3** EPR spectra of the blank (i.e., free ROS trappers): TEMP in MeOH (a), DMPO in H<sub>2</sub>O (b) and DMPO in MeOH (c) in the absence/presence of irradiation ( $\lambda_{\text{ex}} = 405 \text{ nm}$ ).

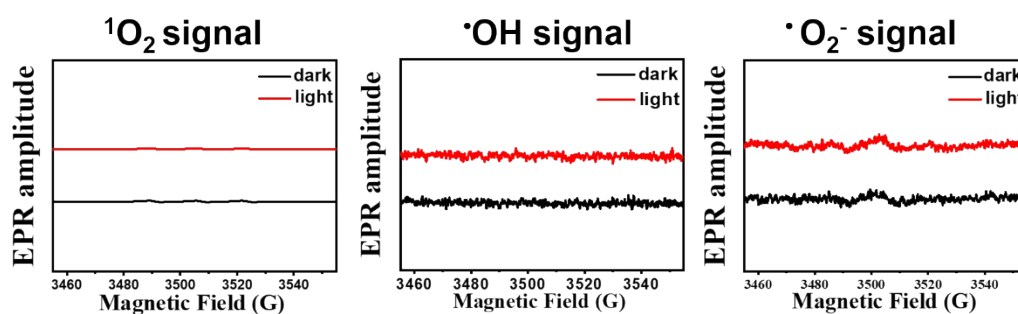

**Fig. S4** EPR spectra of the blank (i.e., free ROS trappers): TEMP in MeOH (a), DMPO in H<sub>2</sub>O (b) and DMPO in MeOH (c) in the absence/presence of irradiation ( $\lambda_{\text{ex}} = 500 \text{ nm}$ ).

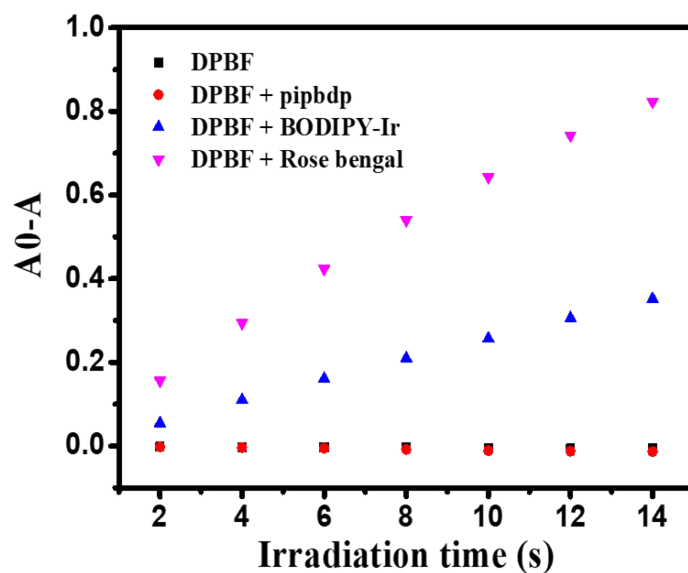

**Fig. S5** Photooxidation of DPBF by **pipbdp** and **BODIPY-Ir**, respectively, in aerated MeOH under irradiation at 500 nm. Changes in absorbance of DPBF at 418 nm was plotted. Rose Bengal ( $\Phi = 0.80$ ) was used as the reference.

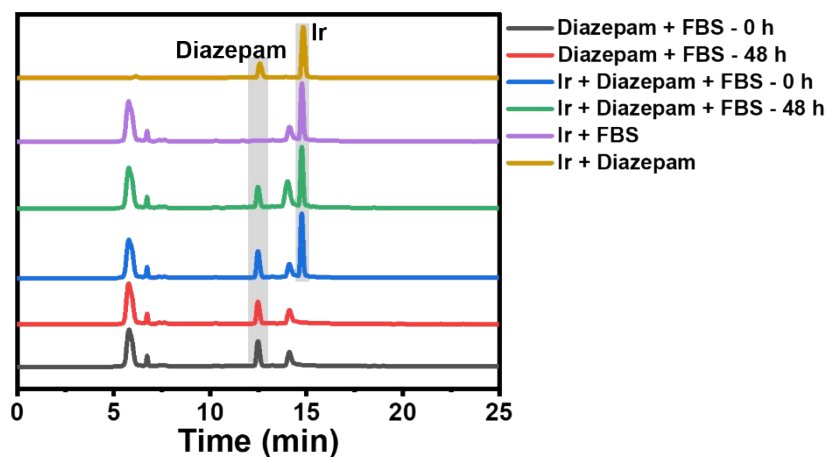

**Fig. S6** HPLC analysis of **BODIPY-Ir** incubated in FBS for 0 h or 48 h.

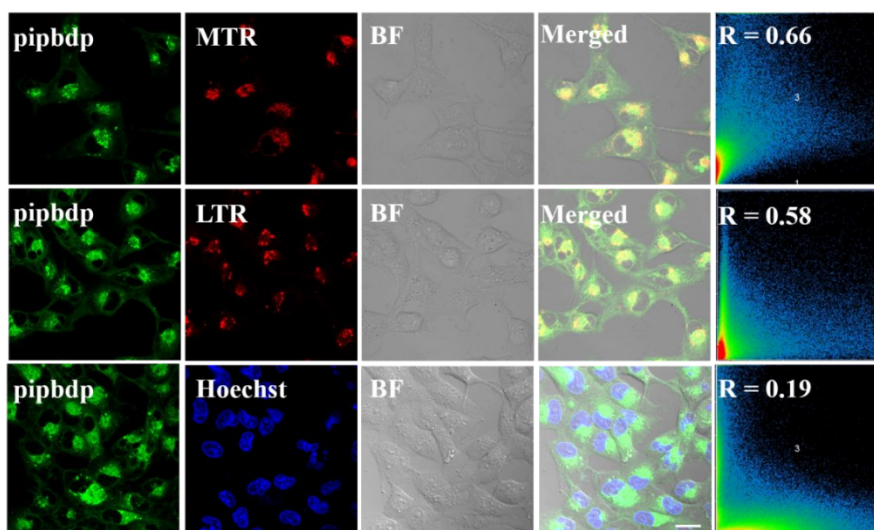

**Fig. S7** Subcellular distribution in MDA-MB-231 cells of **pipbdp** (100 nM, 4 h) by confocal co-localization imaging. The respective Pearson's co-localization coefficient ( $R$ ) of **pipbdp** ( $\lambda_{\text{ex}} = 488$  nm,  $\lambda_{\text{em}} = 515 \pm 20$  nm) with MTR ( $\lambda_{\text{ex}} = 561$  nm,  $\lambda_{\text{em}} = 644 \pm 20$  nm), LTR ( $\lambda_{\text{ex}} = 561$  nm,  $\lambda_{\text{em}} = 590 \pm 20$  nm), and Hoechst 33342 ( $\lambda_{\text{ex}} = 405$  nm,  $\lambda_{\text{em}} = 460 \pm 20$  nm) is provided in the rightmost column (scale bar: 20  $\mu\text{m}$ ).

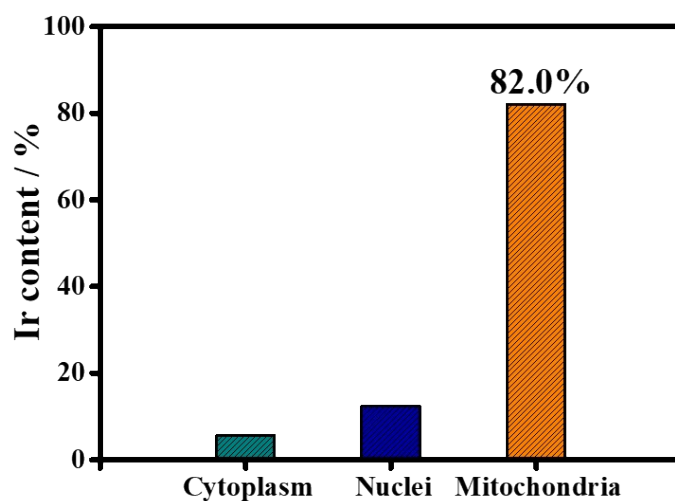

**Fig. S8** ICP-MS quantification of the internalized Ir by the MDA-MB-231 cells. MDA-MB-231 cells were treated with **BODIPY-Ir** (100 nM) at 37 °C for 4 h in the dark. Nuclei (Nuc.), mitochondria (Mito.) and cytoplasm (without Nuclei and mitochondria, Cyto.) were extracted using mitochondrial and nuclear isolation kits.

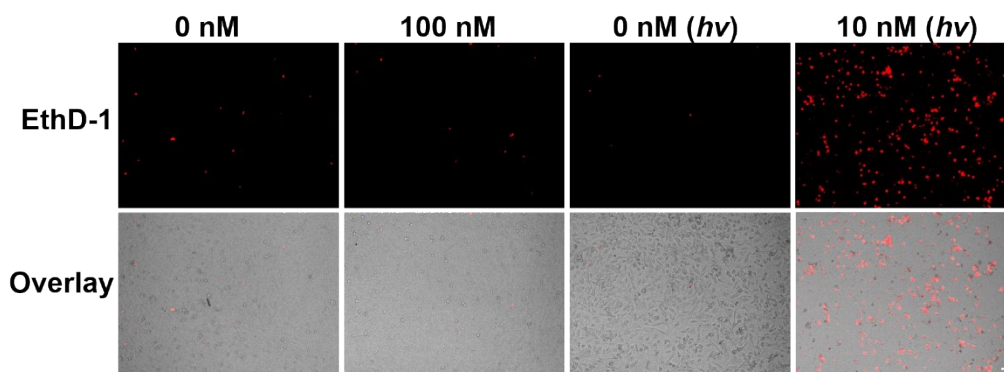

**Fig. S9** Live/Dead cell staining of MDA-MB-231 cells pretreated with **BODIPY-Ir** (10 nM) with/without PDT treatment (500 nm, 6 J cm<sup>-2</sup>). Insert scale bar: 50 μm.



**Table. S1** Crystal data and refinement for **BODIPY-Ir**

---

|                                             |                                                                                                                |
|---------------------------------------------|----------------------------------------------------------------------------------------------------------------|
| Empirical formula                           | C <sub>127</sub> H <sub>99</sub> B <sub>2</sub> Cl <sub>2</sub> F <sub>4</sub> Ir <sub>2</sub> N <sub>16</sub> |
| Formula weight                              | 2402.14                                                                                                        |
| Temperature/K                               | 150.0                                                                                                          |
| Crystal system                              | Triclinic                                                                                                      |
| Space group                                 | P $\bar{1}$                                                                                                    |
| a/Å                                         | 17.6837(15)                                                                                                    |
| b/Å                                         | 18.1876(18)                                                                                                    |
| c/Å                                         | 20.173(2)                                                                                                      |
| $\alpha$ /°                                 | 93.911(5)                                                                                                      |
| $\beta$ /°                                  | 92.383(5)                                                                                                      |
| $\gamma$ /°                                 | 104.711(4)                                                                                                     |
| Volume/Å <sup>3</sup>                       | 6249.3(10)                                                                                                     |
| Z                                           | 2                                                                                                              |
| $\rho_{\text{calc}}/\text{cm}^3$            | 1.277                                                                                                          |
| $\mu/\text{mm}^{-1}$                        | 2.228                                                                                                          |
| F(000)                                      | 2414.0                                                                                                         |
| Crystal size/mm <sup>3</sup>                | 0.07 × 0.03 × 0.025                                                                                            |
| Radiation                                   | MoK $\alpha$ ( $\lambda$ = 0.71073)                                                                            |
| 2 $\Theta$ range for data collection/°      | 2.028 to 49.998                                                                                                |
| Index ranges                                | -14 ≤ h ≤ 21, -21 ≤ k ≤ 21, -23 ≤ l ≤ 23                                                                       |
| Reflections collected                       | 49526                                                                                                          |
| Independent reflections                     | 21312 [ $R_{\text{int}}$ = 0.0946, $R_{\text{sigma}}$ = 0.1732]                                                |
| Data/restraints/parameters                  | 21312/1027/1396                                                                                                |
| Goodness-of-fit on F <sup>2</sup>           | 1.139                                                                                                          |
| Final R indexes [ $I \geq 2\sigma(I)$ ]     | $R_1$ = 0.0981, $wR_2$ = 0.2586                                                                                |
| Final R indexes [all data]                  | $R_1$ = 0.1755, $wR_2$ = 0.2829                                                                                |
| Largest diff. peak/hole / e Å <sup>-3</sup> | 1.77/-1.51                                                                                                     |

---

**Table. S2** Selected bond lengths (Å) and angles (°) for **BODIPY-Ir**

|                 |            |           |
|-----------------|------------|-----------|
| Bond length (Å) | Ir1-N1     | 2.049(8)  |
|                 | Ir1-N2     | 2.057(8)  |
|                 | Ir1-N3     | 2.138(10) |
|                 | Ir1-N4     | 2.162(9)  |
|                 | Ir1-C1     | 2.004(12) |
|                 | Ir1-C12    | 2.014(11) |
| Bond angles (°) | N1-Ir1-N2  | 173.5(4)  |
|                 | N1-Ir1-N3  | 97.3(4)   |
|                 | N1-Ir1-N4  | 88.4(3)   |
|                 | N2-Ir1-N3  | 88.4(3)   |
|                 | N2-Ir1-N4  | 95.8(3)   |
|                 | N3-Ir1-N4  | 77.0(4)   |
|                 | C1-Ir1-N1  | 79.9(4)   |
|                 | C1-Ir1-N2  | 94.5(4)   |
|                 | C1-Ir1-N3  | 175.9(4)  |
|                 | C1-Ir1-N4  | 99.9(4)   |
|                 | C1-Ir1-C12 | 85.4(5)   |
|                 | C12-Ir1-N1 | 95.8(4)   |
|                 | C12-Ir1-N2 | 80.4(4)   |
|                 | C12-Ir1-N3 | 97.9(4)   |
| C12-Ir1-N4      | 173.8(4)   |           |

**Table S3.** Photophysical properties of the compounds in MeOH<sup>a</sup>

| Compound         | $\lambda_{\text{abs}}^{\text{b}}/\text{nm}$ ( $\epsilon^{\text{c}}$ ) | $\lambda_{\text{em}}/\text{nm}$ | $\Phi$ (%) <sup>d</sup> | $\Phi$ ( <sup>1</sup> O <sub>2</sub> ) <sup>e</sup> |
|------------------|-----------------------------------------------------------------------|---------------------------------|-------------------------|-----------------------------------------------------|
| <b>pipbdp</b>    | 270 (3.97), 500 (5.87)                                                | 510                             | 44.2                    | 0                                                   |
| <b>BODIPY-Ir</b> | 270 (8.19), 380 (1.47), 500 (6.49)                                    | 513                             | 10.4                    | 0.35                                                |

<sup>a</sup> Data recorded in MeOH solution, and the excitation wavelength is 480 nm, 298 K.

<sup>b</sup>  $\lambda_{\text{abs}}$  denotes the wavelength corresponding to absorption maximums.

<sup>c</sup> Molar absorption coefficient at the absorption maxima ( $\times 10^4 \text{ M}^{-1} \text{ cm}^{-1}$ ).

<sup>d</sup> Luminescent quantum yield, BODIPY was used as the standard ( $\Phi_{\text{L}} = 0.72$  in THF)<sup>1,2</sup>.

<sup>e</sup> Singlet oxygen quantum yield, Rose Bengal (0.80) was used as the reference<sup>1</sup>.

## References

1. W. Wu, J. Sun, X. Cui and J. Zhao, *J. Mater. Chem. C*, 2013, **1**, 4577.
2. W. Wu, J. Zhao, J. Sun and S. Guo, *J. Org. Chem.*, 2012, **77**, 5305.
